# Supplementary material for: Epicatechin Gallate Protects HBMVECs from Ischemia/Reperfusion Injury through Ameliorating Apoptosis and Autophagy and Promoting Neovascularization
Source: Hindawi journal article supplement (doi:10.1155/2019/7824684), 2019-03-06

1) VEGF

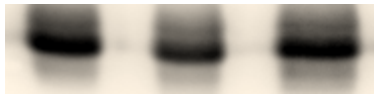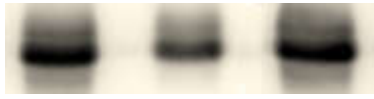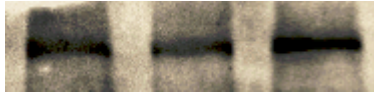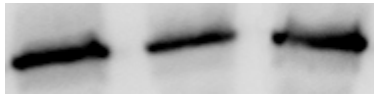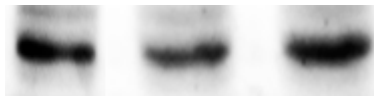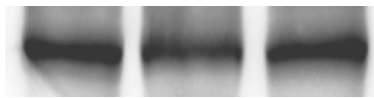

GAPDH

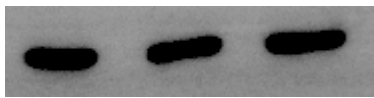

2) Bcl-2

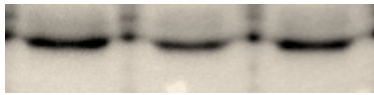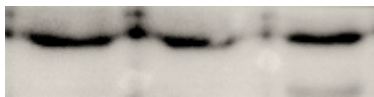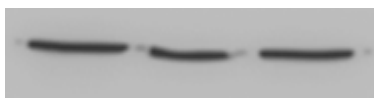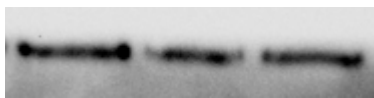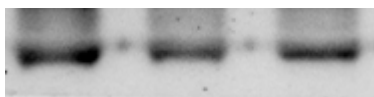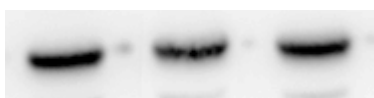

GAPDH

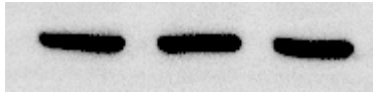

3)BAX

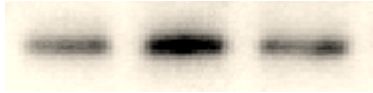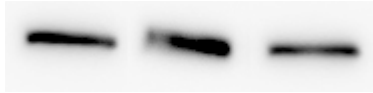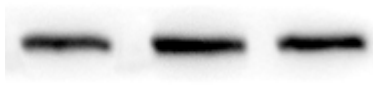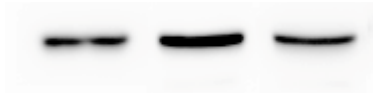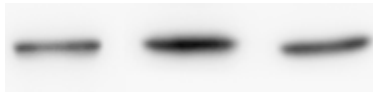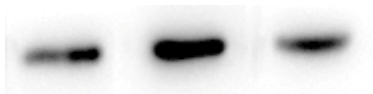

GAPDH

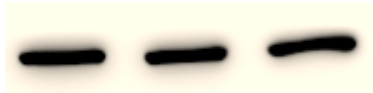

4)mTOR

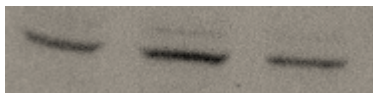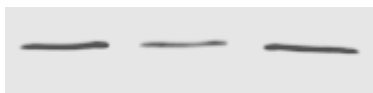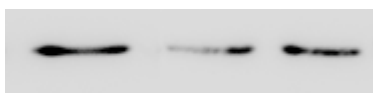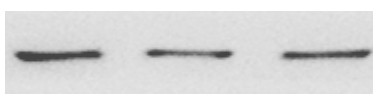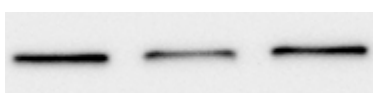

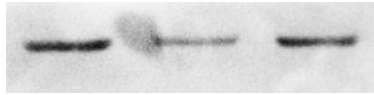

GAPDH

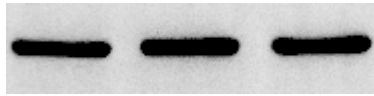

5) BECN-1

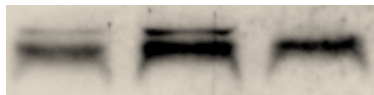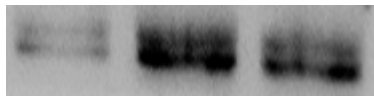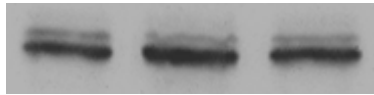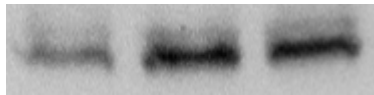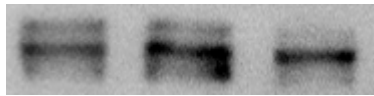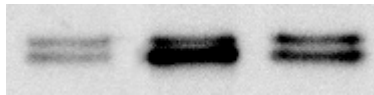

GAPDH

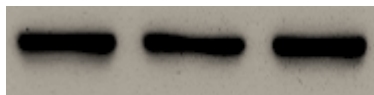

6) Caspase 3

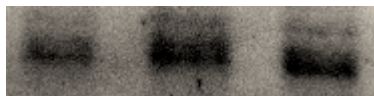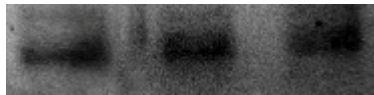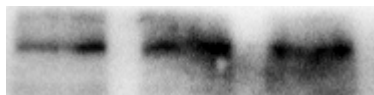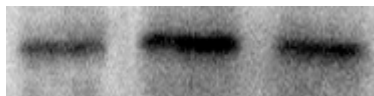

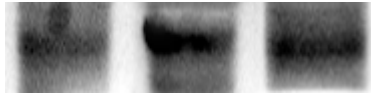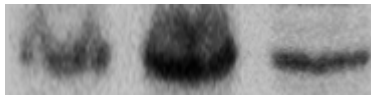

GAPDH

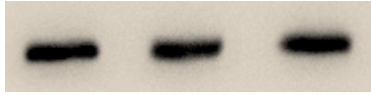

7)Lc3B

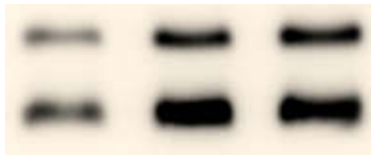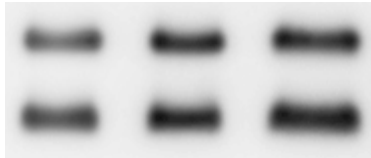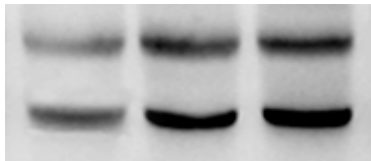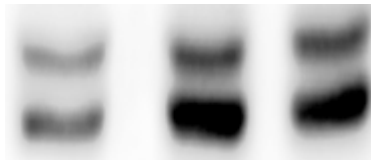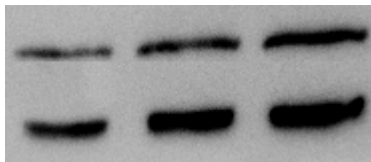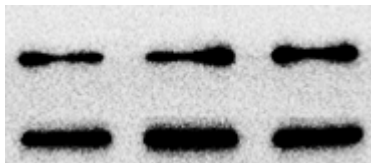

GAPDH

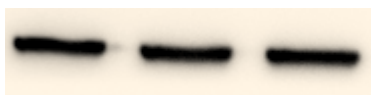

Supplement: f1 [file 7824684.f1.pdf]
